# Supplementary material for: Modeling and Simulation of Control Actuation System with Fuzzy‐PID Logic Controlled Brushless Motor Drives for Missiles Glider Applications
Source: Hindawi journal article supplement (doi:10.1155/2015/723298), 2015-01-01

# Brushless DC-Servomotors

47,1 mNm

For combination with  
Gearheads:  
30/1(S), 32/3(S), 38A, 38/1(S), 38/2(S)  
Encoders:  
IE3-1024(L), 5500, 5540  
Drive Electronics:  
Speed Controller, Motion Controller

## Series 3564 ... B

|                                                                      | 3564 K                  | 012 B                     | 024 B               | 036 B               | 048 B               |                        |
|----------------------------------------------------------------------|-------------------------|---------------------------|---------------------|---------------------|---------------------|------------------------|
| 1 Nominal voltage                                                    | $U_N$                   | 12                        | 24                  | 36                  | 48                  | Volt                   |
| 2 Terminal resistance, phase-phase                                   | R                       | 0,6                       | 1,2                 | 2,8                 | 4,4                 | $\Omega$               |
| 3 Output power <sup>1)</sup>                                         | $P_{2 \max.}$           | 109                       | 101                 | 101                 | 101                 | W                      |
| 4 Efficiency                                                         | $\eta_{\max.}$          | 81                        | 81                  | 81                  | 82                  | %                      |
| 5 No-load speed                                                      | $n_o$                   | 7 850                     | 11 300              | 11 550              | 12 200              | rpm                    |
| 6 No-load current (with shaft $\varnothing$ 4,0 mm)                  | $I_o$                   | 0,206                     | 0,189               | 0,131               | 0,109               | A                      |
| 7 Stall torque                                                       | $M_H$                   | 291                       | 371                 | 379                 | 401                 | mNm                    |
| 8 Friction torque, static                                            | $C_o$                   | 1,10                      | 1,10                | 1,10                | 1,10                | mNm                    |
| 9 Friction torque, dynamic                                           | $C_v$                   | $2,4 \cdot 10^{-4}$       | $2,4 \cdot 10^{-4}$ | $2,4 \cdot 10^{-4}$ | $2,4 \cdot 10^{-4}$ | mNm/rpm                |
| 10 Speed constant                                                    | $k_n$                   | 658                       | 475                 | 324                 | 258                 | rpm/V                  |
| 11 Back-EMF constant                                                 | $k_E$                   | 1,521                     | 2,107               | 3,089               | 3,877               | mV/rpm                 |
| 12 Torque constant                                                   | $k_M$                   | 14,52                     | 20,12               | 29,50               | 37,02               | mNm/A                  |
| 13 Current constant                                                  | $k_i$                   | 0,069                     | 0,050               | 0,034               | 0,027               | A/mNm                  |
| 14 Slope of n-M curve                                                | $\Delta n / \Delta M$   | 27                        | 31                  | 31                  | 31                  | rpm/mNm                |
| 15 Terminal inductance, phase-phase                                  | L                       | 96                        | 194                 | 427                 | 678                 | $\mu H$                |
| 16 Mechanical time constant                                          | $\tau_m$                | 10                        | 11                  | 11                  | 11                  | ms                     |
| 17 Rotor inertia                                                     | J                       | 34                        | 34                  | 34                  | 34                  | gcm <sup>2</sup>       |
| 18 Angular acceleration                                              | $\alpha_{\max.}$        | 86                        | 109                 | 111                 | 118                 | $10^3 \text{ rad/s}^2$ |
| 19 Thermal resistance                                                | $R_{th1} / R_{th2}$     | 2,5 / 6,3                 |                     |                     |                     | K/W                    |
| 20 Thermal time constant                                             | $\tau_{w1} / \tau_{w2}$ | 23 / 1 175                |                     |                     |                     | s                      |
| 21 Operating temperature range                                       |                         | - 30 ... +125             |                     |                     |                     | °C                     |
| 22 Shaft bearings                                                    |                         | ball bearings, preloaded  |                     |                     |                     |                        |
| 23 Shaft load max.:                                                  |                         |                           |                     |                     |                     |                        |
| – radial at 3 000/20 000 rpm (7,4 mm from mounting flange)           |                         | 108 / 73                  |                     |                     |                     | N                      |
| – axial at 3 000/20 000 rpm (push-on only)                           |                         | 50 / 30                   |                     |                     |                     | N                      |
| – axial at standstill (push-on only)                                 |                         | 131                       |                     |                     |                     | N                      |
| 24 Shaft play:                                                       |                         |                           |                     |                     |                     |                        |
| – radial                                                             | $\leq$                  | 0,015                     |                     |                     |                     | mm                     |
| – axial                                                              | $=$                     | 0                         |                     |                     |                     | mm                     |
| 25 Housing material                                                  |                         | aluminium, black anodized |                     |                     |                     |                        |
| 26 Weight                                                            |                         | 310                       |                     |                     |                     | g                      |
| 27 Direction of rotation                                             |                         | electronically reversible |                     |                     |                     |                        |
| <b>Recommended values - mathematically independent of each other</b> |                         |                           |                     |                     |                     |                        |
| 28 Speed up to <sup>2)</sup>                                         | $n_{e \max.}$           | 27 000                    | 27 000              | 27 000              | 27 000              | rpm                    |
| 29 Torque up to <sup>1) 2)</sup>                                     | $M_{e \max.}$           | 47,1                      | 44,0                | 43,9                | 44,0                | mNm                    |
| 30 Current up to <sup>1) 2)</sup>                                    | $I_{e \max.}$           | 3,68                      | 2,50                | 1,71                | 1,36                | A                      |

<sup>1)</sup> at 22 000 rpm

<sup>2)</sup> thermal resistance  $R_{th2}$  by 55% reduced

### Note:

The diagram indicates the recommended speed in relation to the available torque at the output shaft for a given ambient temperature of 22°C.

The diagram shows the motor in a completely insulated as well as thermally coupled condition ( $R_{th2}$  55% reduced).

The nominal voltage ( $U_N$ ) curve shows the operating point at nominal voltage in the insulated and thermally coupled condition. Any points of operation above the curve at nominal voltage will require a higher operating voltage. Any points below the nominal voltage curve will require less voltage.

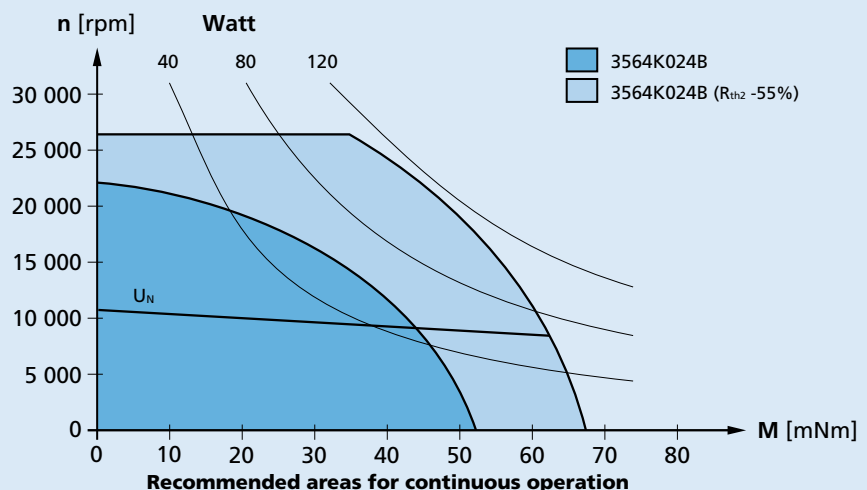

#### Options

K1000:  
Motors in autoclavable version.

K1155:  
Motors for operation with Motion Controllers

#### 3564 K ... B

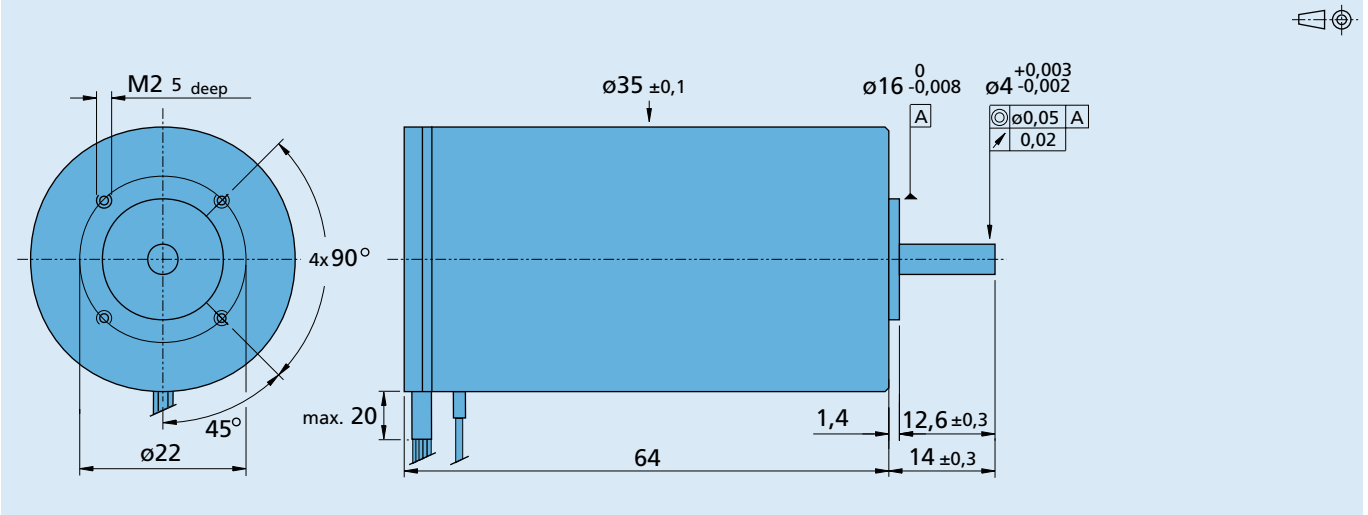

#### 3564 K ... B - K312 with rear end shaft

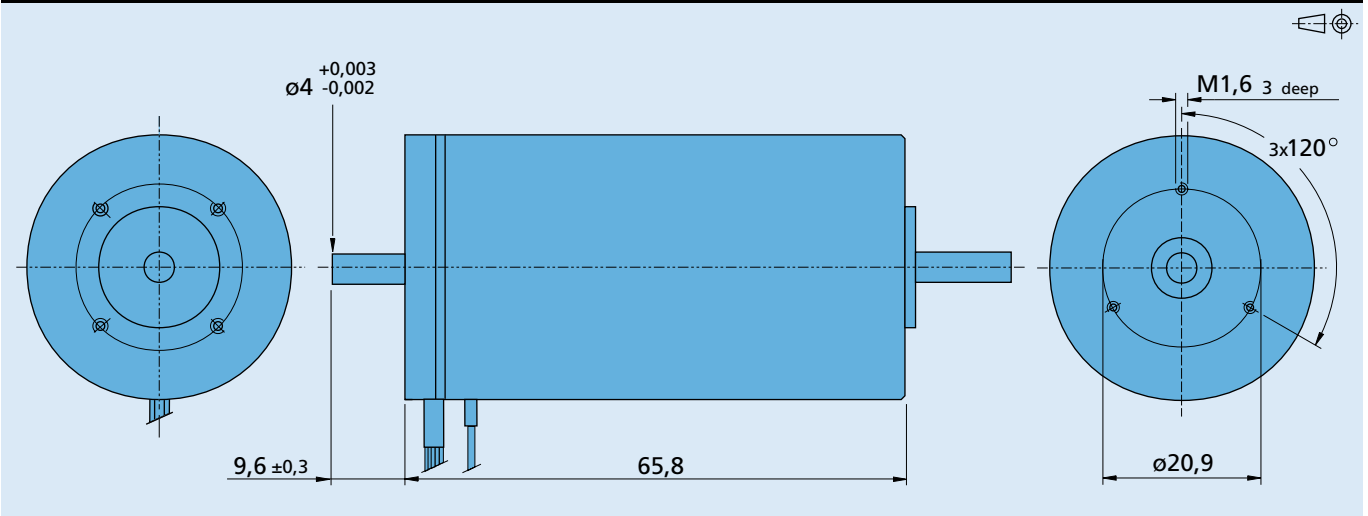

#### Cable and connection information

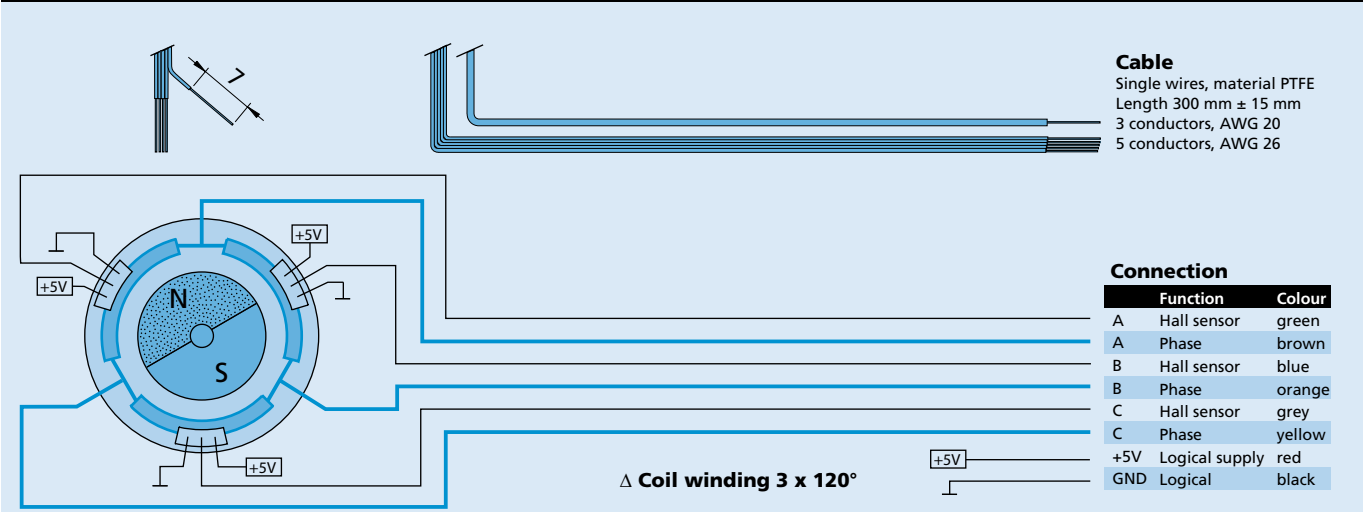

Supplement: f1 [file 723298.f1.pdf]
